# Supplementary material
Source: MDPI journal article supplement (https://www.mdpi.com/2077-0472/11/8/701)
Supplement: s1 [file s1]

## The questionnaire

**Table S1.** Variables used in the questionnaire.

| Item groups                                                                   | Items                                                                                           | Issues                                                                                                                                                                                                                                                                                                                                                                                                                                                                                                                                   | Source |
|-------------------------------------------------------------------------------|-------------------------------------------------------------------------------------------------|------------------------------------------------------------------------------------------------------------------------------------------------------------------------------------------------------------------------------------------------------------------------------------------------------------------------------------------------------------------------------------------------------------------------------------------------------------------------------------------------------------------------------------------|--------|
| <b>Section 1: consumers' habits about food (mean score on 10-point scale)</b> |                                                                                                 |                                                                                                                                                                                                                                                                                                                                                                                                                                                                                                                                          |        |
| 1                                                                             |                                                                                                 | Responsibility for the grocery shopping in family (0=no, 1=yes)                                                                                                                                                                                                                                                                                                                                                                                                                                                                          |        |
| 2                                                                             | Aspects you pay attention when you consume food<br>( <i>Health aspects</i> )                    | The hygienic requirements of food (hygienic)<br>The effects on human health (health_effects)<br>The caloric intake of food (caloric)<br>The food protein intake (proteic_aspects)<br>The food fat intake (fat)<br>The environmental impact of food consumption (environmental_impact)<br>The geographic origin of food (geographic)<br>The food and culinary traditions (traditions)<br>The social impact of food consumption (social_impact)<br>The production method of food (production_methodt)<br>The seasonality of food (seasons) | [1,2]  |
| 3                                                                             | Agreement or disagreement with the following statements<br>( <i>Food neophobia</i> )            | I am very particular about the foods I will eat (attention)<br>I like to try new ethnic restaurants (ethnic_restaurant*)<br>If I don't know what is in a food, I won't try it" (do_not_try)<br>I am constantly sampling new and different foods (new*)<br>I like foods from different cultures (different_culture*)<br>At dinner parties, I will try a new food (new_food*)<br>Ethnic food looks too weird to eat (strange)<br>I don't trust new food (do_not_trust)<br>I am afraid to eat things I have never had before (fear)         | [3]    |
| 4                                                                             | Agreement or disagreement with the following statements<br>( <i>Food technology neophobia</i> ) | I don't have enough knowledge on effects of new food technologies on human health (don't_know_effect on health)<br>New food technologies decrease the natural quality of food (low_quality)                                                                                                                                                                                                                                                                                                                                              | [3]    |

|    |                                                                                                                                                                |                                                                                                                                                                                                                                                                                                                                                                                                                                                                                                                                                                                                                                                                                                                                                                                                                                                                                                                                                                                                                                                                                                                                                                                                                                                                                                                                                                                   |     |
|----|----------------------------------------------------------------------------------------------------------------------------------------------------------------|-----------------------------------------------------------------------------------------------------------------------------------------------------------------------------------------------------------------------------------------------------------------------------------------------------------------------------------------------------------------------------------------------------------------------------------------------------------------------------------------------------------------------------------------------------------------------------------------------------------------------------------------------------------------------------------------------------------------------------------------------------------------------------------------------------------------------------------------------------------------------------------------------------------------------------------------------------------------------------------------------------------------------------------------------------------------------------------------------------------------------------------------------------------------------------------------------------------------------------------------------------------------------------------------------------------------------------------------------------------------------------------|-----|
|    |                                                                                                                                                                | There is no sense in trying out high-tech food products because the ones I eat are already good enough" (good_enough)                                                                                                                                                                                                                                                                                                                                                                                                                                                                                                                                                                                                                                                                                                                                                                                                                                                                                                                                                                                                                                                                                                                                                                                                                                                             |     |
|    |                                                                                                                                                                | The benefits of new food technologies to reduce world hunger are often overstated (world_hunger_overestimated)                                                                                                                                                                                                                                                                                                                                                                                                                                                                                                                                                                                                                                                                                                                                                                                                                                                                                                                                                                                                                                                                                                                                                                                                                                                                    |     |
|    |                                                                                                                                                                | The environmental benefits of new food technologies are often overstated (environmental_benefits_overestimated)                                                                                                                                                                                                                                                                                                                                                                                                                                                                                                                                                                                                                                                                                                                                                                                                                                                                                                                                                                                                                                                                                                                                                                                                                                                                   |     |
|    |                                                                                                                                                                | New food technologies are unnecessary (no_tecnology)                                                                                                                                                                                                                                                                                                                                                                                                                                                                                                                                                                                                                                                                                                                                                                                                                                                                                                                                                                                                                                                                                                                                                                                                                                                                                                                              |     |
|    |                                                                                                                                                                | <b>Section 2: consumers' habits about pasta choices</b>                                                                                                                                                                                                                                                                                                                                                                                                                                                                                                                                                                                                                                                                                                                                                                                                                                                                                                                                                                                                                                                                                                                                                                                                                                                                                                                           |     |
| 5  | Frequency of durum wheat pasta consumption (0= never; 1=once a month; 2=once a week; 3= twice a week; 4= more than twice a week; 5= every day)                 | never<br>once a month<br>once a week<br>twice a week<br>more than twice a week<br>every day                                                                                                                                                                                                                                                                                                                                                                                                                                                                                                                                                                                                                                                                                                                                                                                                                                                                                                                                                                                                                                                                                                                                                                                                                                                                                       | [1] |
| 6  | Places of consumption                                                                                                                                          | at home<br>out of home -bars, restaurants<br>both                                                                                                                                                                                                                                                                                                                                                                                                                                                                                                                                                                                                                                                                                                                                                                                                                                                                                                                                                                                                                                                                                                                                                                                                                                                                                                                                 | [1] |
| 7  | Agreement or disagreement with the following statements (Italian pasta tradition)                                                                              | The origin of the wheat is a qualitative indicator for Pasta (origin as quality indicator)<br>I preference to consume pasta produced with durum wheat cultivated only in Italy (Italian_wheat)<br>I preference to consume pasta produced with durum wheat cultivated only in the South of Italy (Southern_Italy_wheat)<br>I believe Italian pasta is produced only with Italian durum wheat (Italy)<br>I believe Italian pasta is produced with durum wheat cultivated both in Italy and abroad (Italy_and_abroad)<br>I preference to buy pasta with recyclable packaging (recycle_packaging)<br>I believe it is important to have information about benefits effect of pasta (info_health_benefits )<br>I believe it is important to have information about production process of pasta (info_production)<br>I prefer to buy Italian pasta brands regardless of the origin of durum wheat (no_origin)<br>I prefer to buy pasta with a brand linked to an Italian territory with traditions of durum wheat cultivation (territorial_brand)<br>I prefer to buy pasta low environmental impact (low_impact)<br>I prefer to buy pasta with quality certifications (i.e. organic certification etc) (quality_certification)<br>I prefer to buy pasta with healthy certifications (healthy_certification)<br>I prefer to buy pasta with ethical certifications (ethical_certification) | [1] |
| 8  | Attributes you pay attention when you choose pasta (Attributes of pasta)                                                                                       | Production method (method)<br>Pasta types (type)<br>Origin of durum wheat (origin)<br>Producer brand (pasta_brand)<br>Nutritional information on label (label_nutrition)<br>Color (color)<br>Cooking time (time)<br>Cooking type (cook_type)<br>Quality certifications (quality_certification)<br>Price (price)                                                                                                                                                                                                                                                                                                                                                                                                                                                                                                                                                                                                                                                                                                                                                                                                                                                                                                                                                                                                                                                                   | [1] |
| 9  |                                                                                                                                                                | <b>Section 3: consumers' behavior towards functional pasta comprising Opuntia (mean score on 10-point scale)</b>                                                                                                                                                                                                                                                                                                                                                                                                                                                                                                                                                                                                                                                                                                                                                                                                                                                                                                                                                                                                                                                                                                                                                                                                                                                                  |     |
| 10 |                                                                                                                                                                | Have you ever heard about functional pasta comprising Opuntia? (fam) (0=No; 1=Yes)                                                                                                                                                                                                                                                                                                                                                                                                                                                                                                                                                                                                                                                                                                                                                                                                                                                                                                                                                                                                                                                                                                                                                                                                                                                                                                | [2] |
| 11 |                                                                                                                                                                | Have you ever eaten functional pasta comprising Opuntia before? (cons) (0=No; 1=Yes)                                                                                                                                                                                                                                                                                                                                                                                                                                                                                                                                                                                                                                                                                                                                                                                                                                                                                                                                                                                                                                                                                                                                                                                                                                                                                              |     |
| 12 |                                                                                                                                                                | Would you be willing to eat functional pasta comprising Opuntia? (willing) (0=No; 1=Yes)                                                                                                                                                                                                                                                                                                                                                                                                                                                                                                                                                                                                                                                                                                                                                                                                                                                                                                                                                                                                                                                                                                                                                                                                                                                                                          |     |
| 13 | How much would you be willing to pay for functional pasta featuring Opuntia compared with that 1 kg of conventional pasta? (WTP) (0= none, 1= ≤ 50%, 2= > 50%) |                                                                                                                                                                                                                                                                                                                                                                                                                                                                                                                                                                                                                                                                                                                                                                                                                                                                                                                                                                                                                                                                                                                                                                                                                                                                                                                                                                                   |     |
| 14 | What functional pasta characteristics could affect your decision to eat it? (Functional pasta)                                                                 | If I think to eat functional pasta comprising Opuntia, I'm curious to try it (curiosity)<br>If functional pasta comprising Opuntia produces health benefits, I would eat it (health_benefits)<br>If functional pasta comprising Opuntia are more nutrient than conventional pasta, I would eat it (more_nutrient)<br>If functional pasta production is less environmentally impactful than conventional pasta, I would eat it (low_env_impact)<br>If functional pasta is less expensive than conventional pasta, I would eat it (low_cost)<br>If functional pasta is produced by my trusted pasta manufacturing, I would eat it (pasta_factory)<br>If I get more information about functional pasta comprising Opuntia, I would eat it (more_info)<br>I'm disgusted to the idea of eating functional pasta comprising Opuntia (disgust*)                                                                                                                                                                                                                                                                                                                                                                                                                                                                                                                                          | [2] |
|    |                                                                                                                                                                | <b>Section 4: sociodemographic information</b>                                                                                                                                                                                                                                                                                                                                                                                                                                                                                                                                                                                                                                                                                                                                                                                                                                                                                                                                                                                                                                                                                                                                                                                                                                                                                                                                    |     |
| 15 |                                                                                                                                                                | Age                                                                                                                                                                                                                                                                                                                                                                                                                                                                                                                                                                                                                                                                                                                                                                                                                                                                                                                                                                                                                                                                                                                                                                                                                                                                                                                                                                               |     |
| 16 |                                                                                                                                                                | Gender (0=female; 1=male)                                                                                                                                                                                                                                                                                                                                                                                                                                                                                                                                                                                                                                                                                                                                                                                                                                                                                                                                                                                                                                                                                                                                                                                                                                                                                                                                                         |     |
| 17 |                                                                                                                                                                | Education (edu) : 0=primary or secondary (low education); 1=degree, master and/or PhD (high education)                                                                                                                                                                                                                                                                                                                                                                                                                                                                                                                                                                                                                                                                                                                                                                                                                                                                                                                                                                                                                                                                                                                                                                                                                                                                            |     |
| 18 |                                                                                                                                                                | Annual Income (income): 0=< 10,000; 1=10,001 – 20,000; 2=20,001 – 30,000; 3=30,001 – 40,000; 4=40,001 – 50,000; 5=> 50,001                                                                                                                                                                                                                                                                                                                                                                                                                                                                                                                                                                                                                                                                                                                                                                                                                                                                                                                                                                                                                                                                                                                                                                                                                                                        |     |

\*Reversed coded.

Word in brackets refers to the abbreviation of the variable in the manuscript.

Source: adapted from Palmieri et al., 2021.

## References

1. Altamore, L.; Ingrassia, M.; Columba, P.; Chironi, S.; Bacarella, S. Italian Consumers' Preferences for Pasta and Consumption Trends: Tradition or Innovation? *J. Int. Food Agribus. Mark.* **2019**, *0*, 1–24.
2. Palmieri, N.; Suardi, A.; Stefanoni, W.; Pari, L. Opuntia ficus-indica as an Ingredient in New Functional Pasta : Consumer Preferences in Italy. **2021**.
3. Verbeke, W. Profiling consumers who are ready to adopt insects as a meat substitute in a Western society. *Food Qual. Prefer.* **2015**, *39*, 147–155.
